# Supplementary material for: AtMyb56 Regulates Anthocyanin Levels via the Modulation of AtGPT2 Expression in Response to Sucrose in Arabidopsis
Source: PubMed Central journal article supplement — Mol Cells. 2018 Feb 27;41(4):351–61. doi: 10.14348/molcells.2018.2195 (PMC5935099; doi:10.14348/molcells.2018.2195), 2018-02-27
Supplement: molce-41-4-351-suppl.pdf [file molce-41-4-351-suppl.pdf]

**Table S1** Primers for *qRT-PCR*

| Gene                                   | Primer                                                                                     |
|----------------------------------------|--------------------------------------------------------------------------------------------|
| <i>CHS</i><br>( <i>AT5G13930</i> )     | F : 5' AAG CGT CTC ATG ATG TAC 3'<br>R : 5' ACT GAA AAG AGC CTG ACC 3'                     |
| <i>CHI</i><br>( <i>AT2G43570</i> )     | F : 5' GAA TCT ATC CCG TTC TTC CGT GAA 3'<br>R : 5' GGC AGT TTC ATT GTC ACC TTG ATA A 3'   |
| <i>PAP1</i><br>( <i>AT1G56650</i> )    | F : 5' CCG CAA ATG ACG TCA AGA ATT ACT G 3'<br>R : 5' GGA ATG GGC GTA ATG TCT CTC TTT T 3' |
| <i>LDOX</i><br>( <i>AT4G22880</i> )    | F : 5' GTT TGC AGC TTT TCT ACG AGG 3'<br>R : 5' TGA GCA AAA GTC CGT GGA GG 3'              |
| <i>AtMyb56</i><br>( <i>AT5G17800</i> ) | F : 5' ATG AAT CCA AAT CTC CTT GAG AA 3'<br>R : 5' AGA GGG GTT GTT GAG TGA AG 3'           |
| <i>DFR</i><br>( <i>AT5G42800</i> )     | F : 5' ATG GTT AGT CAG AAA GAG ACC 3'<br>R : 5' TAA AGT GAG TAG CGT CTT GG 3'              |
| <i>AtGPT2</i><br>( <i>AT1G61800</i> )  | F : 5' ATG CTT TCT TCA ATC AAA CCA 3'<br>R : 5' GAT GGG AGA CAA CAT TAG CGT T 3'           |
| <i>ACTIN2</i><br>( <i>AT3G18780</i> )  | F : 5' TGT GGA TCT CCA AGG CCG AGT A 3'<br>R : 5' CCC CAG CTT TTT AAG CCT TTG ATC 3'       |

# Figure S1

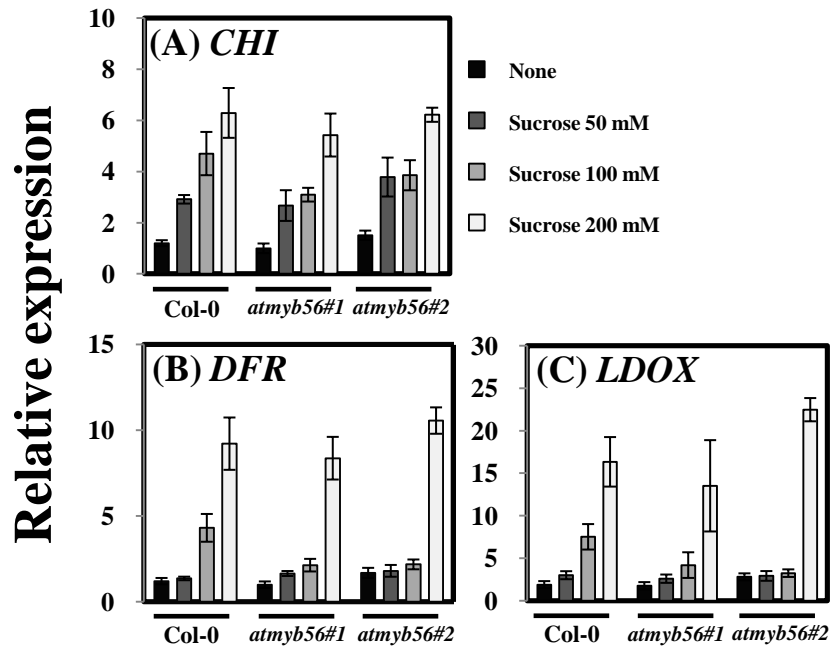

# Figure S2

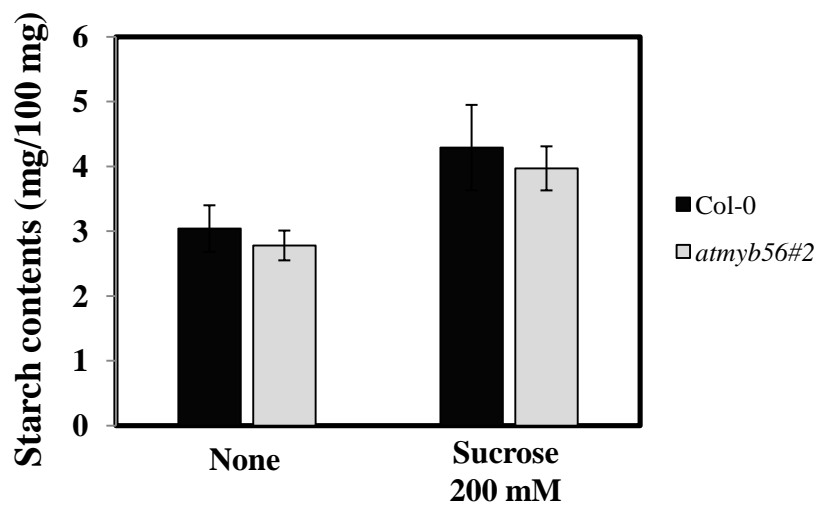

## Supplementary Figure Legends

### **Figure S1. Transcript levels of *CHI*, *DFR*, and *LDOX* in Col-0, *atmyb56 #1*, and *atmyb56 #2* seedlings in response to sucrose.**

Transcript levels of (A) *CHI*, (B) *DFR*, and (C) *LDOX* in Col-0, *atmyb56#1* and *atmyb56#2* seedlings exposed to 0, 50, 100, or 200 mM sucrose were determined by qRT-PCR. Error bars represent the standard errors (SEs) of three biological replicates.

### **Figure S2. Starch contents of Col-0 and *atmyb56#2* seedlings with or without sucrose treatment.**

The starch contents of 14-day-old Col-0 and *atmyb56#2* seedlings grown for 24 h on media containing 0 or 200 mM sucrose were determined. A representative result is shown from three independent experiments with 0.5 g seedlings (dried samples) each. Error bars represent the standard errors (SEs) of three biological replicates.
